# Supplementary material for: The First Genetic Linkage Map of Winged Bean [Psophocarpus tetragonolobus (L.) DC.] and QTL Mapping for Flower-, Pod-, and Seed-Related Traits
Source: MDPI journal article supplement (doi:10.3390/plants11040500), 2022-02-12
Supplement: s1 [file s1]

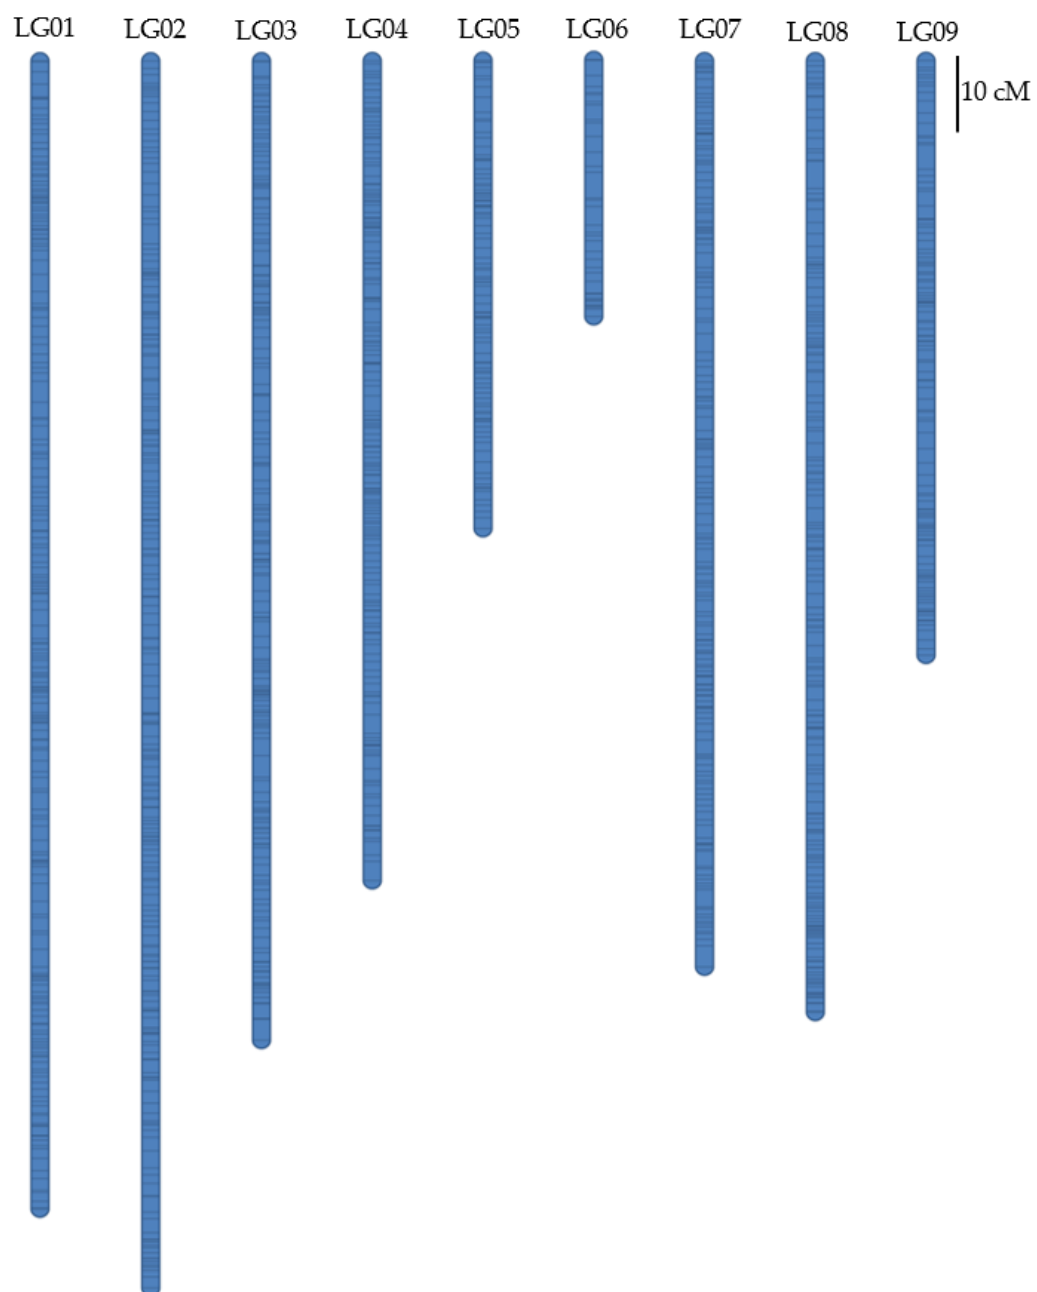

**Figure S1.** A genetic linkage map of the winged bean [*Psophocarpus tetragonolobus* (L.) DC.] constructed from an 86 F<sub>2</sub> population, derived from the W054 x TPT9 cross, using SNP markers.
